# Supplementary material
Source: PubMed Central journal article supplement (PMC3365922)
Supplement: NIHMS359861-supplement-1.pdf [file NIHMS359861-supplement-1.pdf]

## eAppendix to On the Nondifferential Misclassification of a Binary Confounder

**Result 2** For  $A$ , and  $C$  binary, the partial control result holds for the effect of treatment on the treated on the RD, RR, and OR scales.

**Proof:** We will show that  $E_{C'|A=1}[Y|A = 1]=E[Y|A = 1]=E[Y_1|A = 1]$  and that  $E_{C'|A=1}[Y|A = 0]$  is between  $E[Y|A = 0]$  and  $E[Y_0|A = 1]$ . It then follows immediately that the observed adjusted effect is between the crude and true effects on the RD, RR, and OR scales. First, note that  $E[Y_1|A = 1] = E[Y|A = 1]$  by the consistency assumption, and

$$\begin{aligned} E_{C'|A=1}[Y|A = 1] &= E[Y|A = 1, C' = 1]P[C' = 1|A = 1] + E[Y|A = 1, C' = 0]P[C' = 0|A = 1] \\ &= E[Y|A = 1] \end{aligned}$$

We now prove that  $E_{C'|A=1}[Y|A = 0]$  is between  $E[Y|A = 0]$  and  $E[Y_0|A = 1]$ . It is enough to show that  $E[Y_0|A = 1] - E_{C'|A=1}[Y|A = 0]$  and  $E_{C'|A=1}[Y|A = 0] - E[Y|A = 0]$  have the same sign, where

$$\begin{aligned} &E[Y_0|A = 1] - E_{C'|A=1}[Y|A = 0] \\ &= (E[Y|A = 0, C = 1] - E[Y|A = 0, C = 0]) \\ &\quad \times (\{E[C|A = 1, C' = 1] - E[C|A = 0, C' = 1]\} E[C'|A = 1] \\ &\quad + \{E[C|A = 1, C' = 0] - E[C|A = 0, C' = 0]\} (1 - E[C'|A = 1])) \end{aligned}$$

and

$$\begin{aligned}
& E_{C'|A=1}[Y|A=0] - E[Y|A=0] \\
= & (E[Y_0|A=1] - E[Y|A=0]) - (E[Y_0|A=1] - E_{C'|A=1}[Y|A=0]) \\
= & (E[Y|A=0, C=1] - E[Y|A=0, C=0]) (E[C|A=1] - E[C|A=0]) \\
& - (E[Y|A=0, C=1] - E[Y|A=0, C=0]) \\
& \times (\{E[C|A=1, C'=1] - E[C|A=0, C'=1]\} E[C'|A=1] \\
& + \{E[C|A=1, C'=0] - E[C|A=0, C'=0]\} (1 - E[C'|A=1])) \\
= & (E[Y|A=0, C=1] - E[Y|A=0, C=0]) \\
& \times (E[C|A=0, C'=1] \{E[C'|A=1] - E[C'|A=0]\} \\
& - E[C|A=0, C'=0] \{E[C'|A=1] - E[C'|A=0]\})
\end{aligned}$$

Then, it is enough to show that

$$\begin{aligned}
& \{E[C|A=1, C'=1] - E[C|A=0, C'=1]\} E[C'|A=1] \\
& + \{E[C|A=1, C'=0] - E[C|A=0, C'=0]\} (1 - E[C'|A=1])
\end{aligned} \tag{1}$$

and

$$\begin{aligned}
& E[C|A=0, C'=1] \{E[C'|A=1] - E[C'|A=0]\} \\
& - E[C|A=0, C'=0] \{E[C'|A=1] - E[C'|A=0]\}
\end{aligned} \tag{2}$$

have the same sign. We will prove this by showing that (1) and (2) are simultaneously either maximized or minimized at 0.

We consider two cases:  $e \geq 1 - f$  and  $e \leq 1 - f$ , where  $e$  is sensitivity and  $f$  is specificity. In the first case  $E[C|A=a, C']$  is increasing in  $C'$  for all  $a$ , while in the

second case it is decreasing in  $C'$  for all  $a$ , with equality in both cases when  $e = f = 0.5$ .

We now prove that  $E[C|A = 1] \leq E[C|A = 0] \iff E[C'|A = 1] \leq E[C'|A = 0]$  when  $e \geq 1 - f$ . That  $E[C|A = 1] \leq E[C|A = 0] \iff E[C'|A = 1] \geq E[C'|A = 0]$  when  $e \leq 1 - f$  follows by a similar argument. Note that

$$E[C'|A = 1] = E[C|A = 1]e + (1 - E[C|A = 1])(1 - f)$$

and

$$E[C'|A = 0] = E[C|A = 0]e + (1 - E[C|A = 0])(1 - f)$$

are both convex combinations of  $e$  and  $(1 - f)$ . If  $E[C|A = 1] > E[C|A = 0]$ , then  $E[C|A = 1] : (1 - E[C|A = 1]) > E[C|A = 0] : (1 - E[C|A = 0])$  and  $E[C'|A = 1]$  will be closer to  $e$  and therefore greater than  $E[C'|A = 0]$ . If  $E[C|A = 1] < E[C|A = 0]$ , the reverse relationship holds and  $E[C'|A = 1] < E[C'|A = 0]$ .

Now we turn our attention to the minima and maxima of expressions (1) and (2); we will find the extreme values with respect to  $E[C|A, C']$ . The derivative of (2) with respect to  $E[C|A = 0, C' = 1]$  is  $E[C'|A = 1] - E[C'|A = 0]$  and the derivative with respect to  $E[C|A = 0, C' = 0]$  is  $-\{E[C'|A = 1] - E[C'|A = 0]\}$ . Therefore (2) is monotonic in both  $E[C|A = 0, C' = 1]$  and  $E[C|A = 0, C' = 0]$ , and furthermore it is non-decreasing in one and non-increasing in the other. Therefore, the unconstrained extrema occur at  $E[C|A = 0, C' = 1] = 1$  and  $E[C|A = 0, C' = 0] = 0$ , and at  $E[C|A = 0, C' = 1] = 0$  and  $E[C|A = 0, C' = 0] = 1$ . But we know that when  $e \geq 1 - f$  these conditional expectations are constrained to be nondecreasing in  $C'$ ; therefore the constrained extrema occur at  $E[C|A = 0, C' = 1] = 1$  and  $E[C|A = 0, C' = 0] = 0$  and at  $E[C|A = 0, C' = 1] = E[C|A = 0, C' = 0] = 1$ . On the other hand, when  $e \leq 1 - f$

these conditional expectations are constrained to be nonincreasing in  $C'$  and therefore the constrained extrema occur at  $E[C|A = 0, C' = 1] = 0$  and  $E[C|A = 0, C' = 0] = 1$  and at  $E[C|A = 0, C' = 1] = E[C|A = 0, C' = 0] = 1$ .

When  $E[C|A = 0, C' = 1] = E[C|A = 0, C' = 0]$ , (2) equals 0. If  $E[C'|A = 1] < E[C'|A = 0]$ , then this is the maximum of (2) if  $e \geq 1 - f$  and the minimum if  $e \leq 1 - f$ . If  $E[C'|A = 1] > E[C'|A = 0]$  then (2) is maximized at 0 if  $e \leq 1 - f$  and minimized at 0 if  $e \geq 1 - f$ .

To find the extrema of (1), we restrict our attention to the case where  $E[C'|A = 0] < E[C'|A = 1]$  and  $e \geq 1 - f$ . We will show that (1) is also minimized at 0. Because (1) is equal to

$$E[C|A = 1] - E[C|A = 0, C' = 1]P[C' = 1|A = 1] - E[C = 1|A = 0, C' = 0]P[C' = 0|A = 1]$$

proving that it is minimized at 0 is equivalent to proving that

$$E[C|A = 0, C' = 1]P[C' = 1|A = 1] + E[C = 1|A = 0, C' = 0]P[C' = 0|A = 1] \quad (3)$$

is maximized at  $E[C|A = 1]$ . We will maximize (3) with respect to  $e$  and  $f$ .

Let  $D = E[C|A = 0]$  and  $B = E[C|A = 1]$ .

$$\begin{aligned} & E[C|A = 0, C' = 1]P[C' = 1|A = 1] - E[C = 1|A = 0, C' = 0]P[C' = 0|A = 1] \\ &= D \left( e \frac{Be + (1 - B)(1 - f)}{De + (1 - D)(1 - f)} + (1 - e) \frac{1 - \{Be + (1 - B)(1 - f)\}}{1 - \{De + (1 - D)(1 - f)\}} \right) \end{aligned} \quad (4)$$

If  $e \geq 1 - f$ , then  $D \leq B$  and (4) is increasing in  $e$  (the derivative with respect to  $e$  is

positive), so in order to maximize it we set  $e = 1$ . Now (4) reduces to  $D \frac{B+(1-B)(1-f)}{D+(1-D)(1-f)}$ , which is increasing in  $f$  (the derivative with respect to  $f$  is positive) and is therefore maximized at  $f = 1$ . At  $e = f = 1$ ,  $\sum_{C'} E[C|A = 0, C']P[C'|A = 1] = E[C|A = 1]$ . Therefore, (1) is minimized at 0.

That (1) is minimized at 0 when  $E[C'|A = 0] < E[C'|A = 1]$  and  $e \leq 1 - f$ , and that it is maximized at 0 when  $E[C'|A = 0] < E[C'|A = 1]$  and  $e \geq 1 - f$  or when  $E[C'|A = 0] > E[C'|A = 1]$  and  $e \leq 1 - f$ , follow by analogous arguments.

**Result 3** For  $A$  and  $C$  binary, if sensitivity+specificity  $\geq 1$  then the bias of the observed adjusted effect of treatment on the treated decreases with increasing sensitivity and specificity. If in addition  $E[Y|A, C]$  is monotonic in  $C$ , then the bias of the observed adjusted average treatment effect decreases with increasing sensitivity and specificity.

**Proof:** Under monotonicity,  $E_{C'}[Y|A = a]$  lies between  $E[Y_a]$  and  $E[Y|A = a]$  for  $a = 0, 1$ . We will show that  $E_{C'}[Y|A = 1]$  and  $E_{C'}[Y|A = 0]$  move further from  $E[Y|A = a]$  and closer to  $E[Y_a]$  as  $e$  and  $f$  increase. The result follows immediately.

When  $e + f \geq 1$ , the signs of  $\frac{\partial}{\partial e} E_{C'}[Y|A = 1]$  and  $\frac{\partial}{\partial f} E_{C'}[Y|A = 1]$  depend only on the sign of  $\{E[Y|A = 1, C = 1] - E[Y|A = 1, C = 0]\}\{E[A|C = 0] - E[A|C = 1]\}$ . When  $E[Y|A, C]$  and  $E[A|C]$  are both either non-increasing or non-decreasing in  $C$  this product is negative (or 0) and  $E_{C'}[Y|A = 1]$  is non-increasing in  $e$  and  $f$ , i.e. as  $e$  and  $f$  increase  $E_{C'}[Y|A = 1]$  moves closer to  $E[Y_1]$  and farther from  $E[Y|A = 1]$ . (Recall that  $E[Y_1] \leq E[Y|A = 1]$  when both conditional expectations are either non-increasing or non-decreasing in  $C$ .) When one of  $E[Y|A, C]$  and  $E[A|C]$  is non-increasing and the other non-decreasing then the product is non-negative and  $E_{C'}[Y|A = 1]$  is non-

increasing in  $e$  and  $f$ , which again entails that as  $e$  and  $f$  increase  $E_{C'}[Y|A = 1]$  moves closer to  $E[Y_1]$  and further from  $E[Y|A = 1]$ .

The proof that  $E_{C'}[Y|A = 0]$  approaches  $E[Y_0]$  as  $e$  and  $f$  increase is similar.
